# Supplementary material for: High Li+ transference gel interface between solid-oxide electrolyte and cathode for quasi-solid lithium-ion batteries
Source: Royal Society of Chemistry journal article supplement (doi:10.1039/c9ta02515d), 2019-01-01
Supplement: c9ta02515d1.pdf [file c9ta02515d1.pdf]

## Electronic Supplementary Information

### **High Li<sup>+</sup> Transference Gel Interface between Solid-Oxide Electrolyte and Cathode for Quasi-Solid Lithium-Ion Batteries**

Ramesh Subramani,<sup>a</sup> Yu-Hsien Tseng,<sup>a</sup> Yuh-Lang Lee,<sup>a,b</sup> Chi-Cheng Chiu,<sup>a,b</sup> Sheng-Shu Hou,<sup>a,b</sup> and Hsisheng Teng<sup>a,b,c,\*</sup>

<sup>a</sup>Department of Chemical Engineering, National Cheng Kung University, Tainan 70101, Taiwan

<sup>b</sup>Hierarchical Green-Energy Materials (Hi-GEM) Research Center, National Cheng Kung University, Tainan 70101, Taiwan

<sup>c</sup>Center of Applied Nanomedicine, National Cheng Kung University, Tainan 70101, Taiwan

\*E-mail: [hteng@mail.ncku.edu.tw](mailto:hteng@mail.ncku.edu.tw)

Supporting information for:

- (1) Surface morphology of garnet LLZTO pellet
- (2) Morphology of P(AN-co-MA) membrane and GPE
- (3) Ionic conductivity of GPE and LE
- (4) Determination of electrolyte  $t_{Li^+}$  values
- (5) Stable voltage range of electrolytes
- (6) Current dependence of battery discharge capacities
- (7) Cycling performance of Li|(Al/LLZTO/LE)|LiFePO<sub>4</sub>
- (8) Rate capability test for Li|(Al/LLZTO/GPE)|LiFePO<sub>4</sub>
- (9) Impedance spectra of the batteries
- (10) Performance of Li|(GPE/LLZTO/GPE)|LiFePO<sub>4</sub>

## 1. Surface morphology of garnet LLZTO pellet

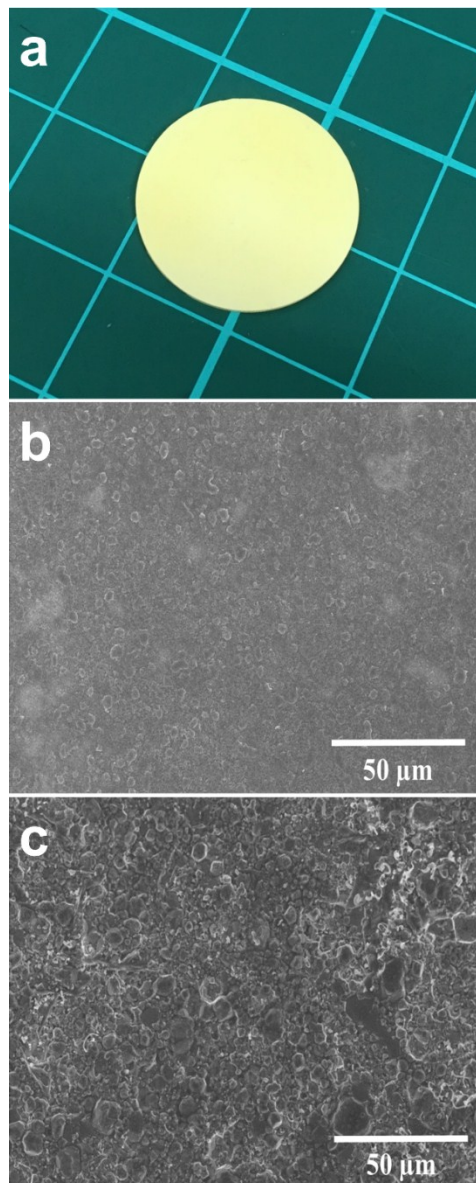

**Fig. S1** Characteristics of the garnet LLZTO pellet. (a) Photograph of the finely polished garnet LLZTO pellet. (b,c) SEM images of the LLZTO pellet, (b) top view and (c) cross-sectional view.

## 2. Morphology of P(AN-co-MA) membrane and GPE

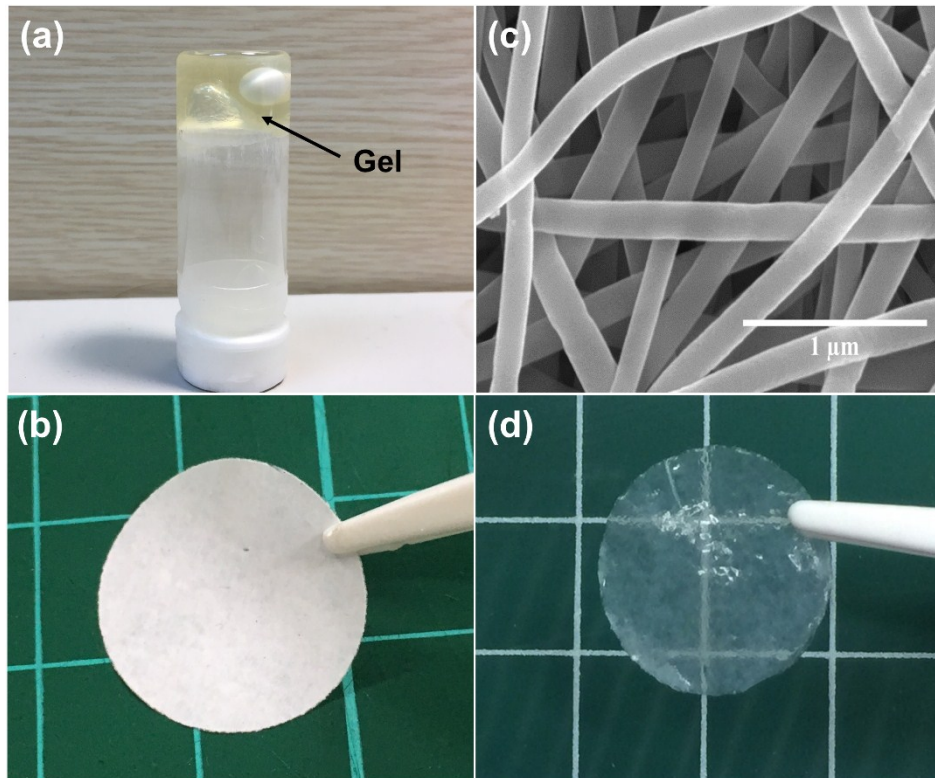

**Fig. S2** Morphology of the P(AN-co-MA) membrane and GPE. (a) Mixture of the LE and P(AN-co-MA) at a mass ratio of 20:1. (b) Photograph of the P(AN-co-MA) membrane. (c) SEM image of the P(AN-co-MA) membrane. (d) Photograph of the GPE membrane.

### 3. Ionic conductivity of GPE and LE

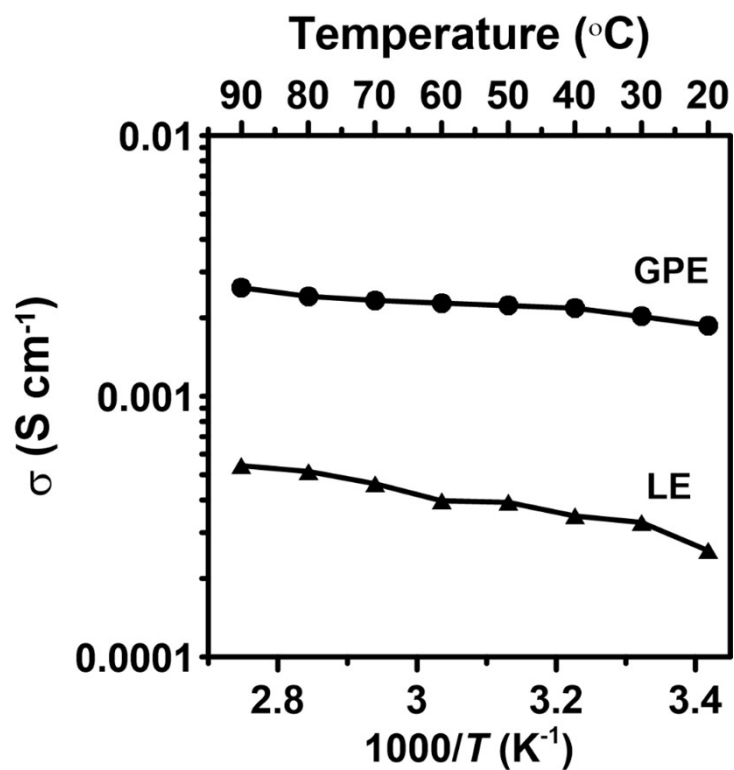

**Fig. S3** Temperature dependence of the ionic conductivity of the GPE and separator-supported LE presented in an Arrhenius plot. The electrolytes was sandwiched between two stainless-steel electrodes for the measurements in a temperature range of 20–90  $^{\circ}\text{C}$ .

#### 4. Determination of electrolyte $t_{Li^+}$ values

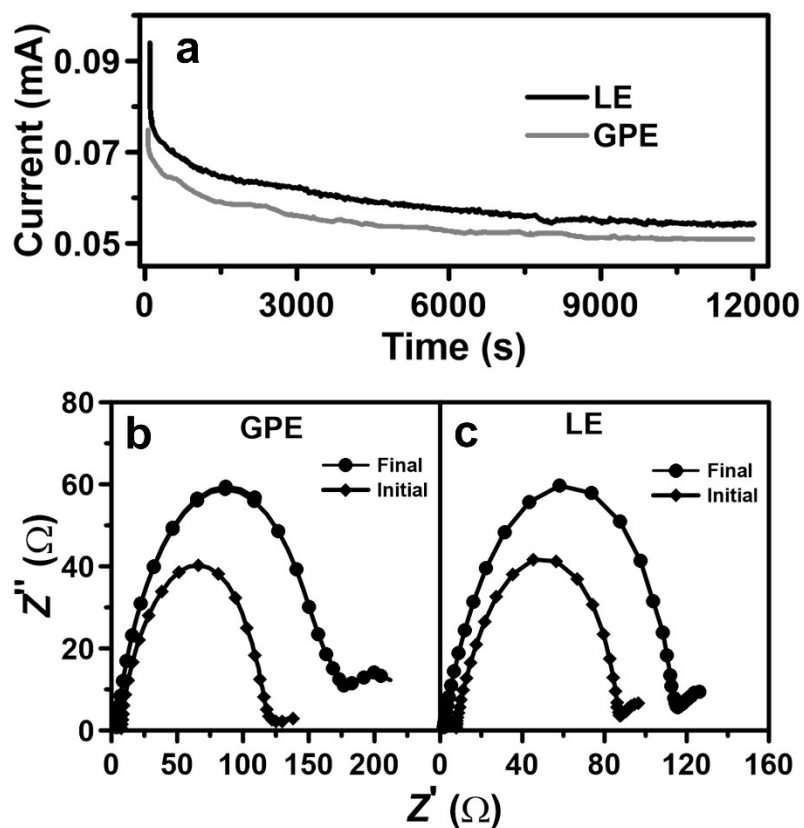

**Fig. S4** (a) Current–time curves of the Li|electrolyte|Li cells following application of a DC voltage of 10 mV to the cells. (b,c) Corresponding Nyquist impedance plots of the cells using electrolytes (b) GPE and (c) separator-supported LE. The impedance plots were used to determine the initial ( $R_{int,0}$ ) and final ( $R_{int,ss}$ ) resistance values.

## 5. Stable voltage range of electrolytes

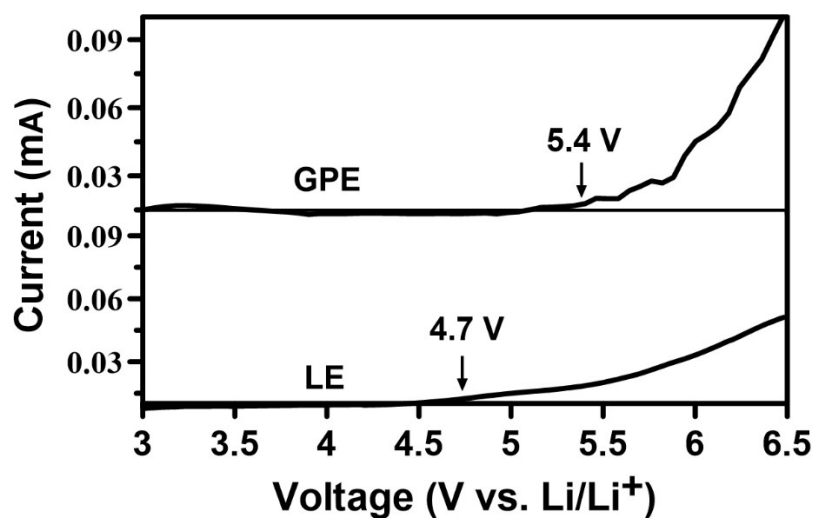

**Fig. S5** Linear scan voltammetry curves for the GPE and separator-supported LE with a scan rate of  $5 \text{ mV s}^{-1}$ . Li-metal and stainless-steel electrodes were used as the reference and working electrodes, respectively.

## 6. Current dependence of battery discharge capacities

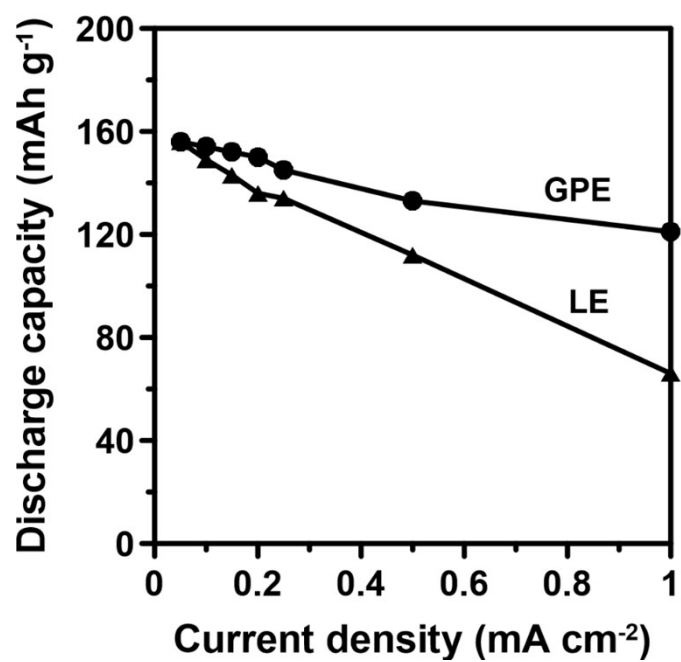

**Fig. S6** Variation in discharge capacity with discharge current densities (0.05–1 mA cm<sup>-2</sup>) for the Li|(Al/LLZTO/interlayer)|LiFePO<sub>4</sub> batteries with interlayers of the GPE and LE.

## 7. Cycling performance of Li|(Al/LLZTO/LE)|LiFePO<sub>4</sub>

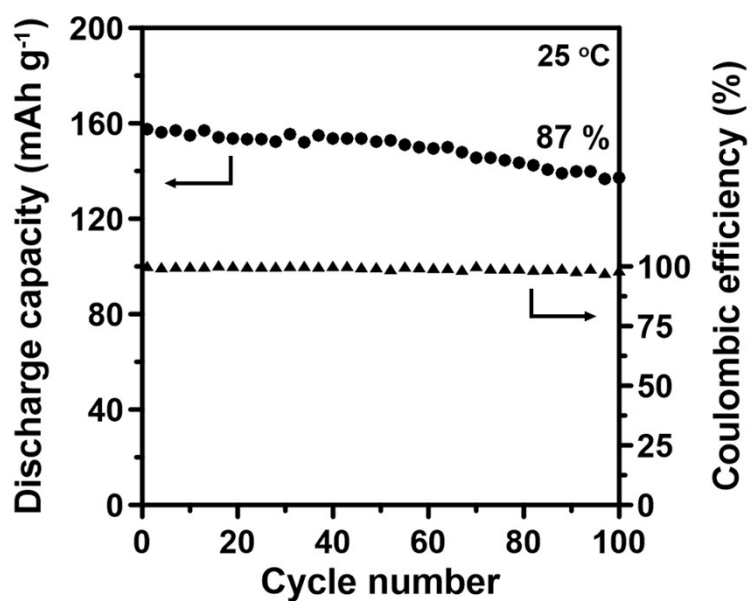

**Fig. S7** Galvanostatic charge–discharge cycling performance of the Li|(Al/LLZTO/LE)|LiFePO<sub>4</sub> battery at 0.05 mA cm<sup>-2</sup>.



## 8. Rate capability test for Li|(Al/LLZTO/GPE)|LiFePO<sub>4</sub>

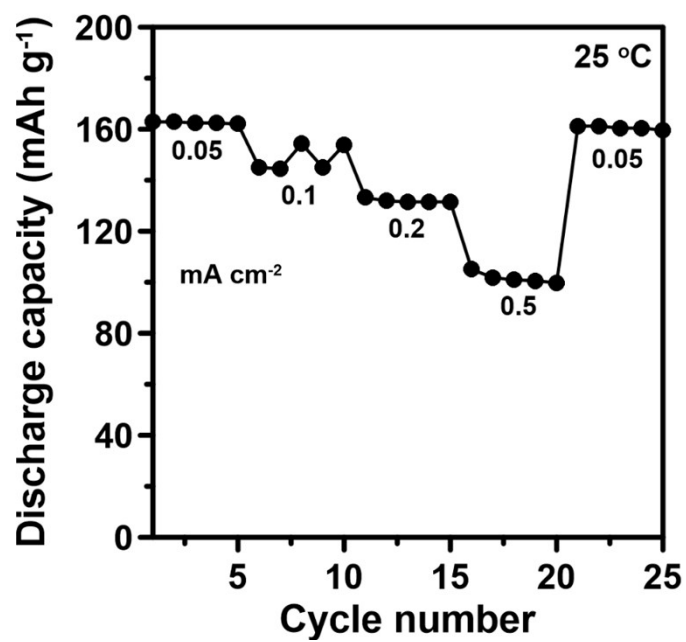

**Fig. S8** Room-temperature (25 °C) discharge capacities of the Li|(Al/LLZTO/GPE)|LiFePO<sub>4</sub> battery in a series of galvanostatic charge–discharge cycles at various current densities.

## 9. Impedance spectra of the batteries

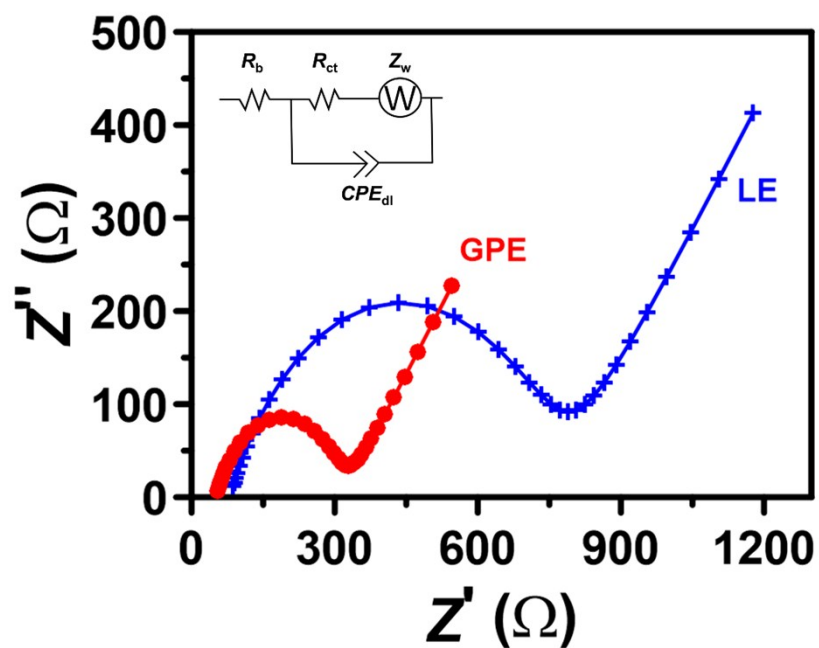

**Fig. S9** Impedance spectra of the batteries  $\text{Li}(\text{Al}/\text{LLZTO}/\text{GPE})|\text{LiFePO}_4$  and  $\text{Li}(\text{Al}/\text{LLZTO}/\text{LE})|\text{LiFePO}_4$  obtained at 3.4 V. The solid-line curves are the simulations of the impedance data based on the equivalent circuit presented as the figure inset.

## 10. Performance of Li|(GPE/LLZTO/GPE)|LiFePO<sub>4</sub>

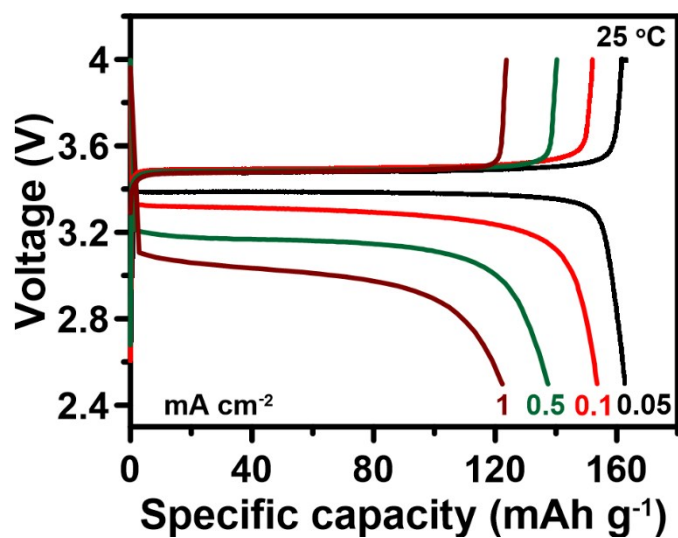

**Fig. S10** Room-temperature (25 °C) galvanostatic charge–discharge profiles of the Li|(GPE/LLZTO/GPE)|LiFePO<sub>4</sub> battery operated at different discharge densities with the charge densities maintained at 0.05 mA cm<sup>-2</sup>.
